# Supplementary material
Source: Springer Nature journal article supplement (https://www.springermedizin.de/resource/supplementary/12906_2001_9_MOESM9_ESM.pdf/9519328)

- ◆ CaCl<sub>2</sub>-Ca<sub>0</sub> Sulph-30
- CaCl<sub>2</sub>-Ak-30
- ▲ CaCl<sub>2</sub>-Ca<sub>0</sub> Sulph-200
- ◆ CaCl<sub>2</sub>-Ak-200

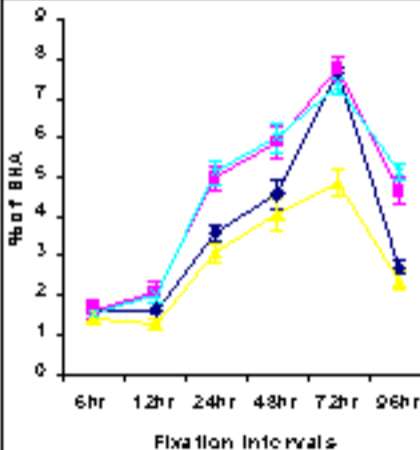

Supplement: MOESM9 [file 9519328]
